# Supplementary material for: Independent Transposon Exaptation Is a Widespread Mechanism of Redundant Enhancer Evolution in the Mammalian Genome
Source: PubMed Central journal article supplement — Genome Biol Evol. 2020 Feb 17;12(3):1–17. doi: 10.1093/gbe/evaa004 (PMC7093719; doi:10.1093/gbe/evaa004), 2020-02-17
Supplement: evaa004_supplementary_data.pdf [file evaa004_supplementary_data.pdf]

# Independent transposon exaptation is a widespread mechanism of redundant enhancer evolution in the mammalian genome

Nicolai K. H. Barth<sup>+</sup>, Lifei Li<sup>+</sup> and Leila Taher<sup>+##</sup>\*

<sup>+</sup> Division of Bioinformatics, Department of Biology, Friedrich-Alexander-Universität Erlangen-Nürnberg, Erlangen, Germany.

<sup>#</sup> Current address: Institute of Biomedical Informatics, Graz University of Technology, Graz, Austria

\* To whom correspondence should be addressed. Email: [leila.taher@tugraz.at](mailto:leila.taher@tugraz.at)

This document contains

**Supplementary Figures S1 to S16**

**Supplementary Tables S1 to S5**

**Supplementary Materials and Methods**

**SUPPLEMENTARY FIGURES**

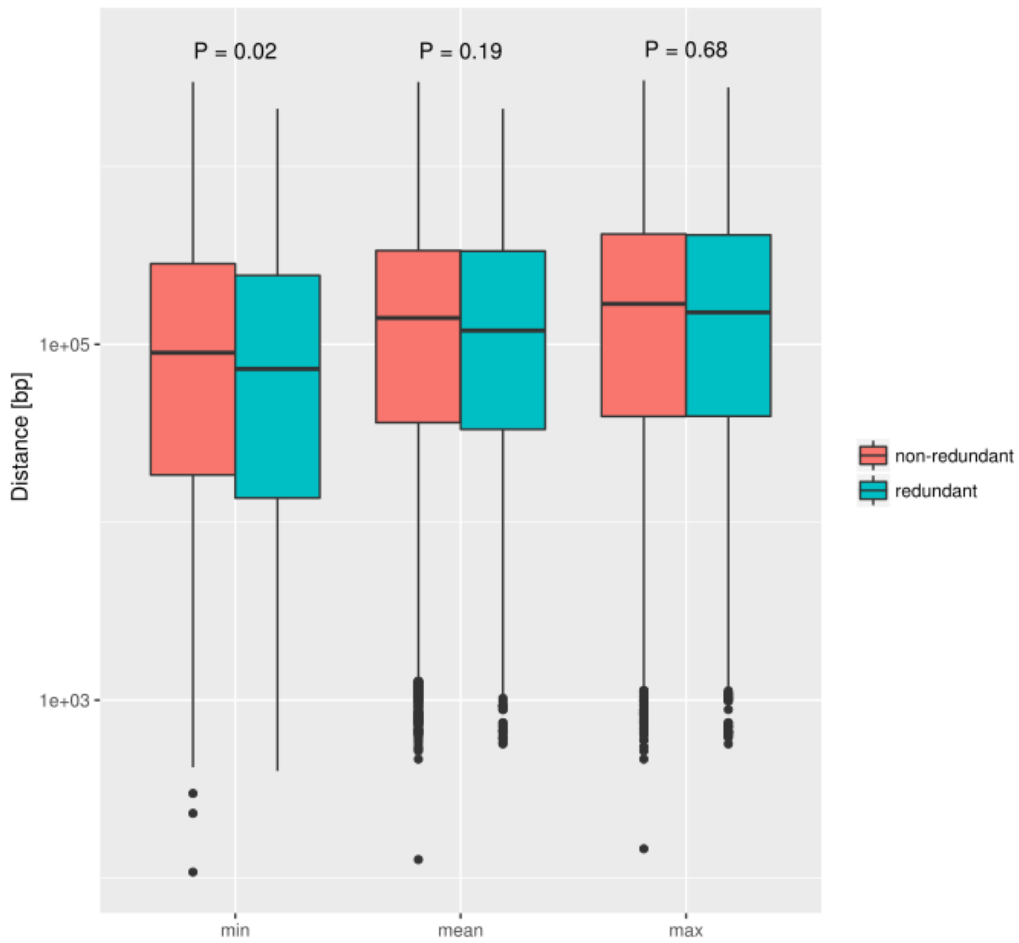

Figure S1. Distance to the (nearest:min, average:mean, farthest:max) TSS of a target gene for 1,280 shadow and 2,243 non-shadow enhancers in the human genome. P-values from Wilcoxon rank-sum tests.

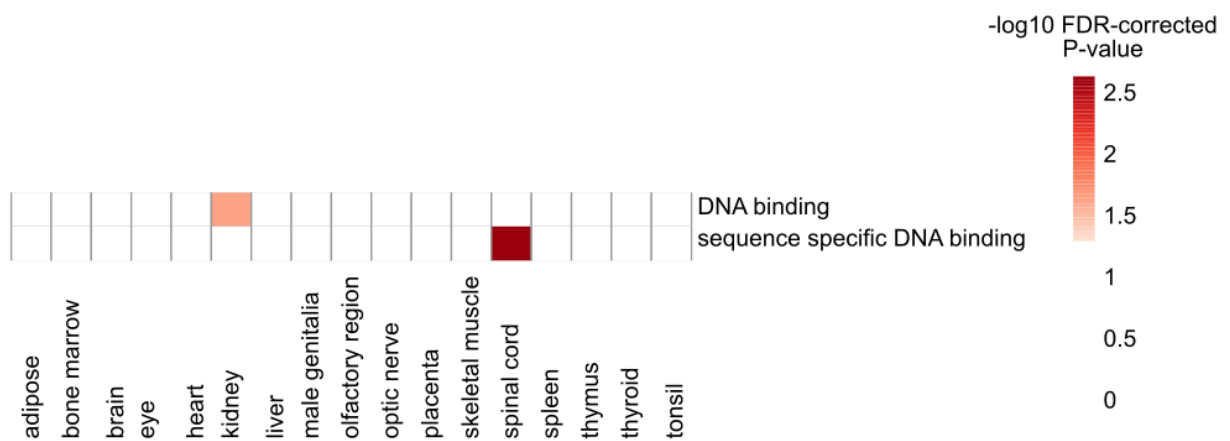

Figure S2. Functional analysis of human redundant enhancer target genes, per facet. The target genes of all correlated enhancers served as background set. Coloring: White cells represent tests with an FDR-corrected P-value >0.05, red represents significant tests, the darker the red tone the lower the P-value. Scale: negative base 10 logarithm of the FDR-corrected P-values.

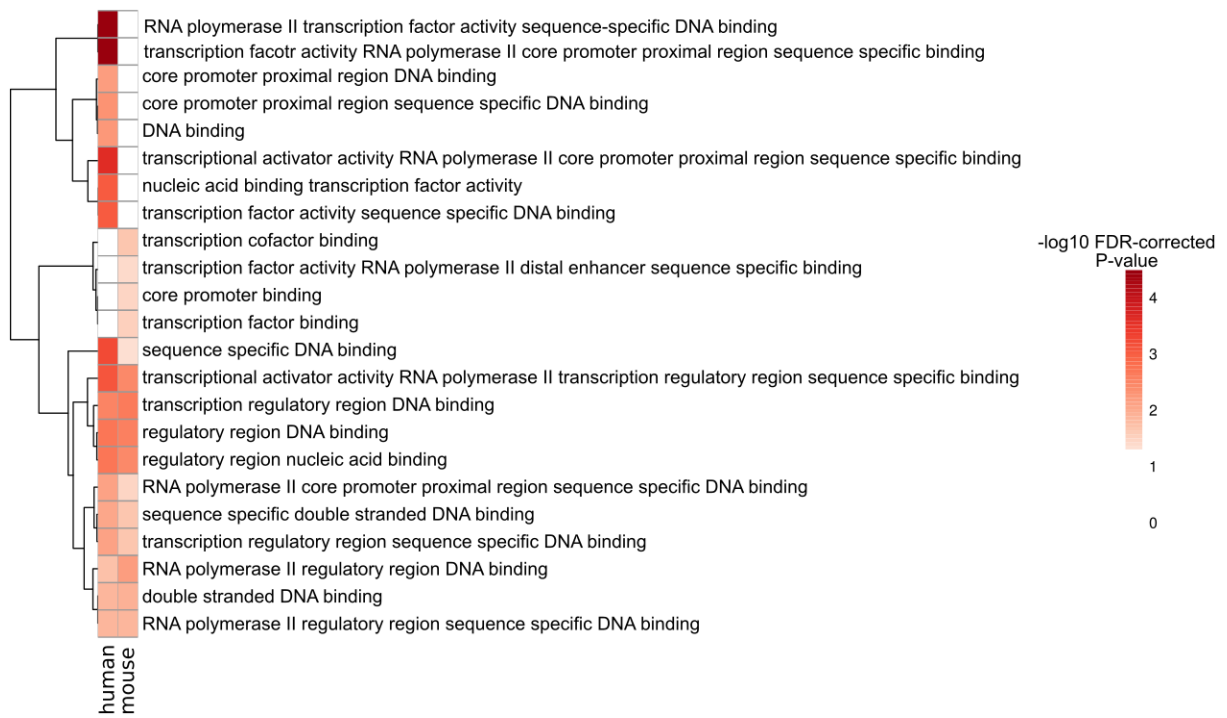

Figure S3. Functional analysis of human and mouse redundant enhancer target genes. The target genes of all correlated enhancers served as background set. See Figure S3 for coloring and scale.

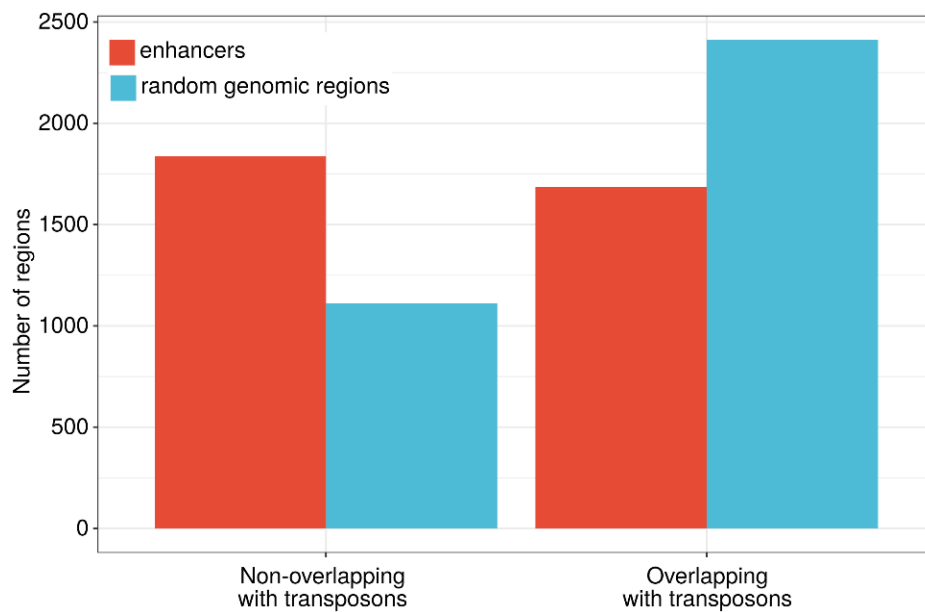

Figure S4. Number of human enhancers annotated as transposons. Random genomic regions show more frequent transposon overlaps than enhancers.

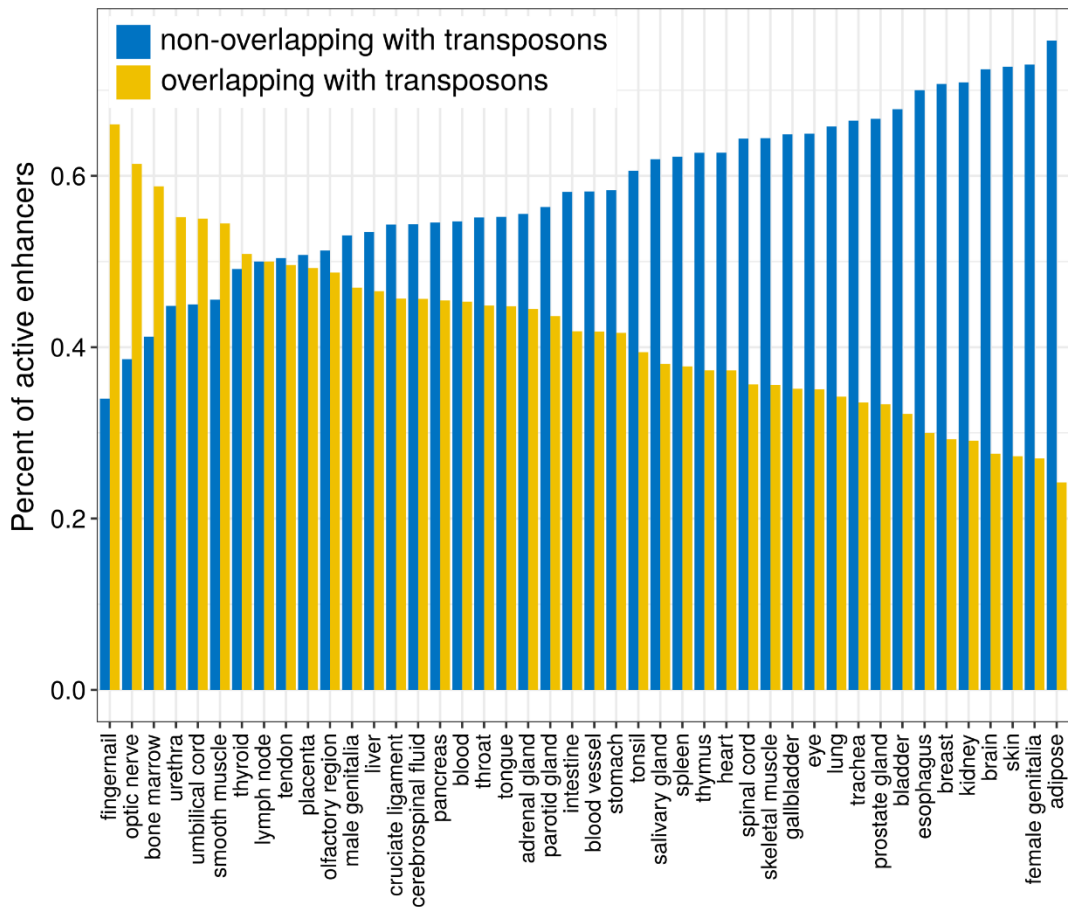

Figure S5. The fraction of transposon overlapping enhancers out of all active enhancers depends on the facet.

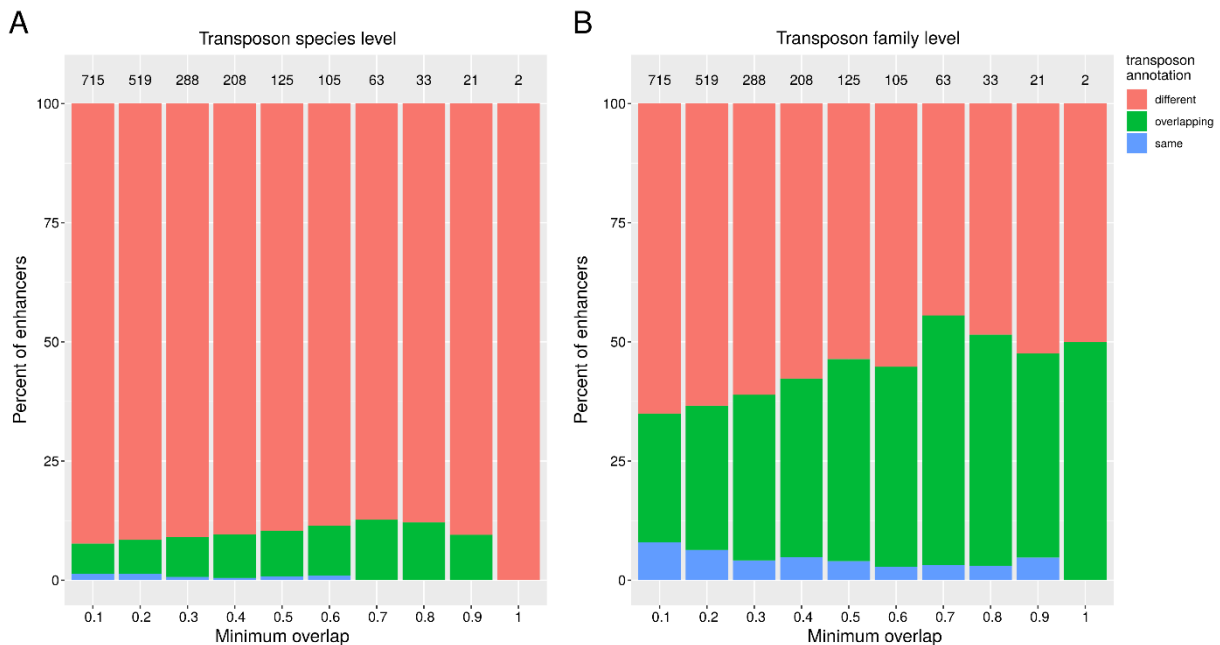

Figure S6. Percent of transposon-shadow enhancer pairs where partners are annotated as transposons from different, shared or identical families, for increasing thresholds of overlap between the enhancer and the transposon sequences for the enhancer to be annotated as a transposon, as fraction of the total enhancer sequence. The numbers above the bars are the total number of pairs where both partners fulfill the overlap criterion. For a 100% overlap there is only a hand full of redundant enhancer pairs left.

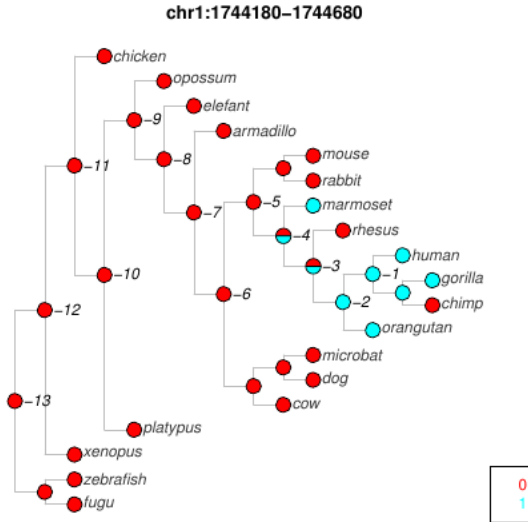

Figure S7. Topology of the phylogenetic tree used for the character state reconstruction of human transposon shadow enhancers. Nodes corresponding to ancestral species are labeled with negative numbers. Ancestral state inferences for the enhancer with coordinates chr1:1,744,180-1,744,680 (hg19). In this example, node -4 is the inferred transposon insertion node.

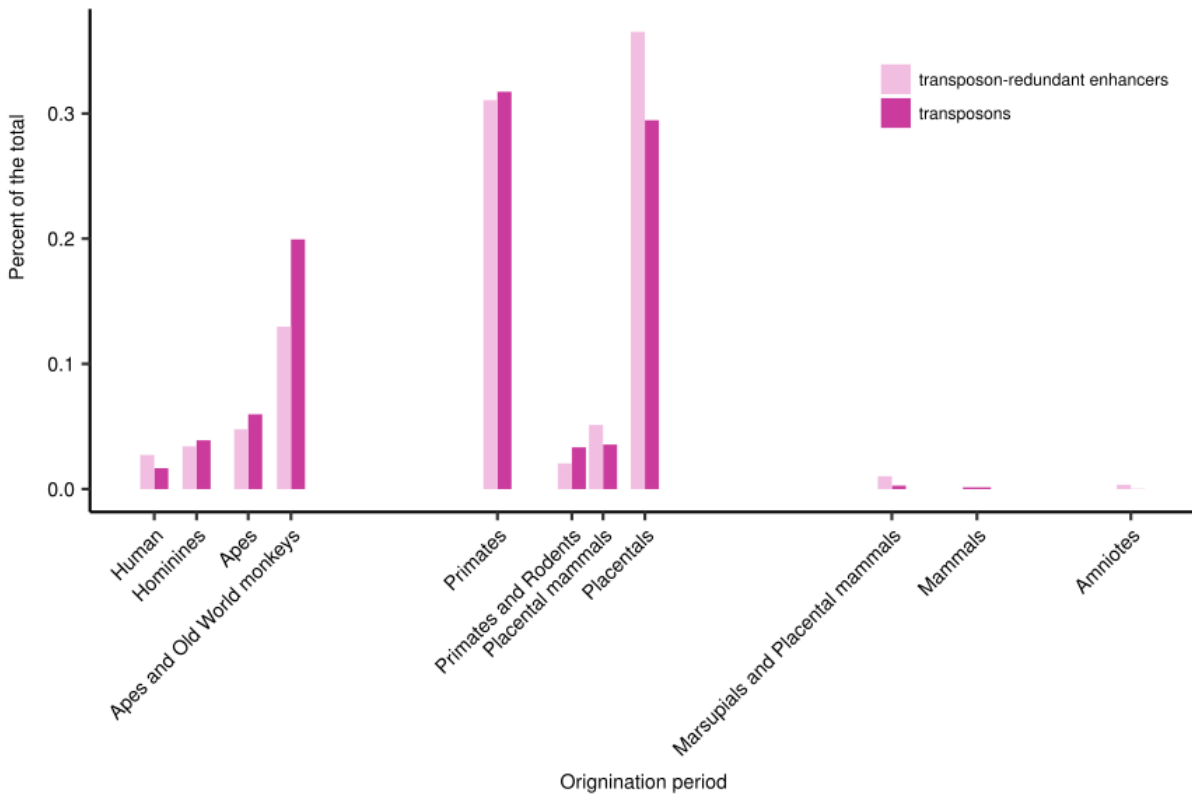

Figure S8. Ages of transposon-shadow enhancers and of random genomic transposon sequences as inferred from the reconstruction of ancestral states in the phylogenetic tree. The nodes of the tree were mapped to clades according to the ENSEMBL COMPARA species tree ([www.ensembl.org/info/about/speciestree.html](http://www.ensembl.org/info/about/speciestree.html)).

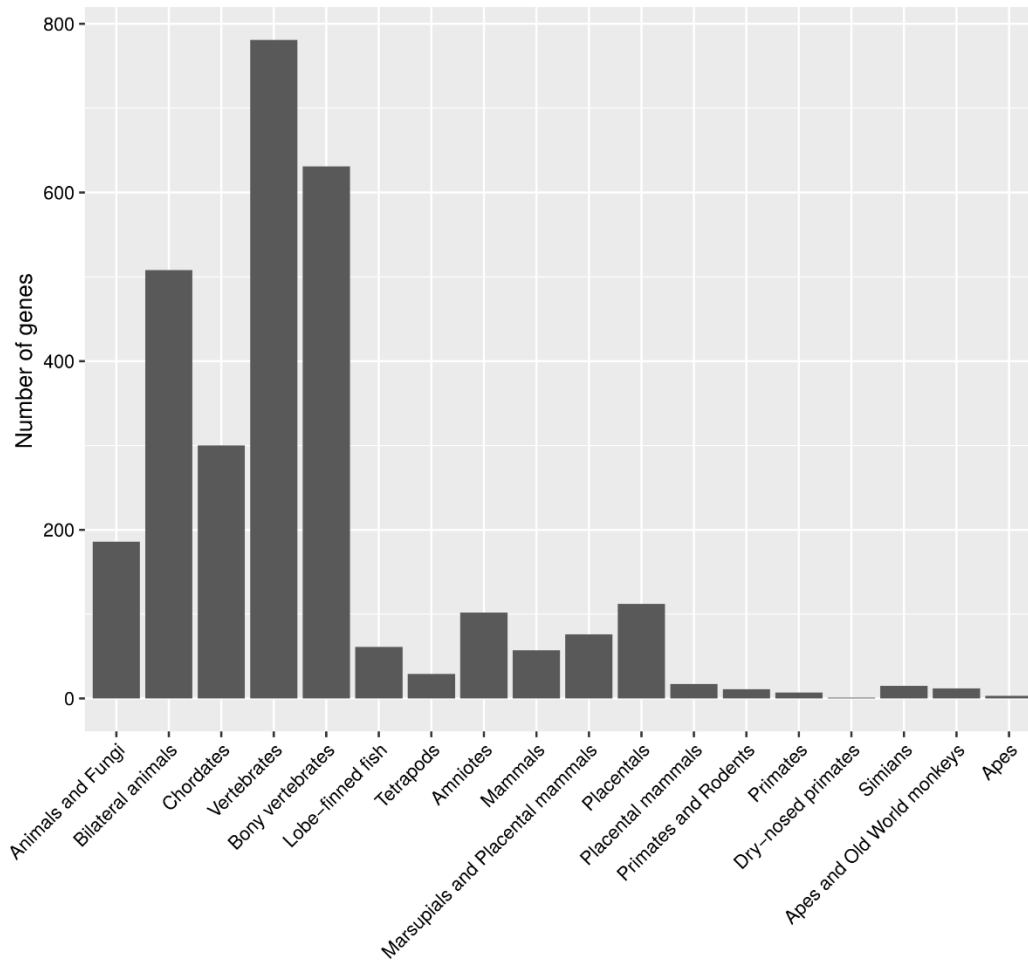

Figure S9. Age of human enhancer target genes. The gene age estimates were extracted from the ENSEMBL COMPARA gene phylogenetic trees. No information was available for 67 genes (excluded from this graph).

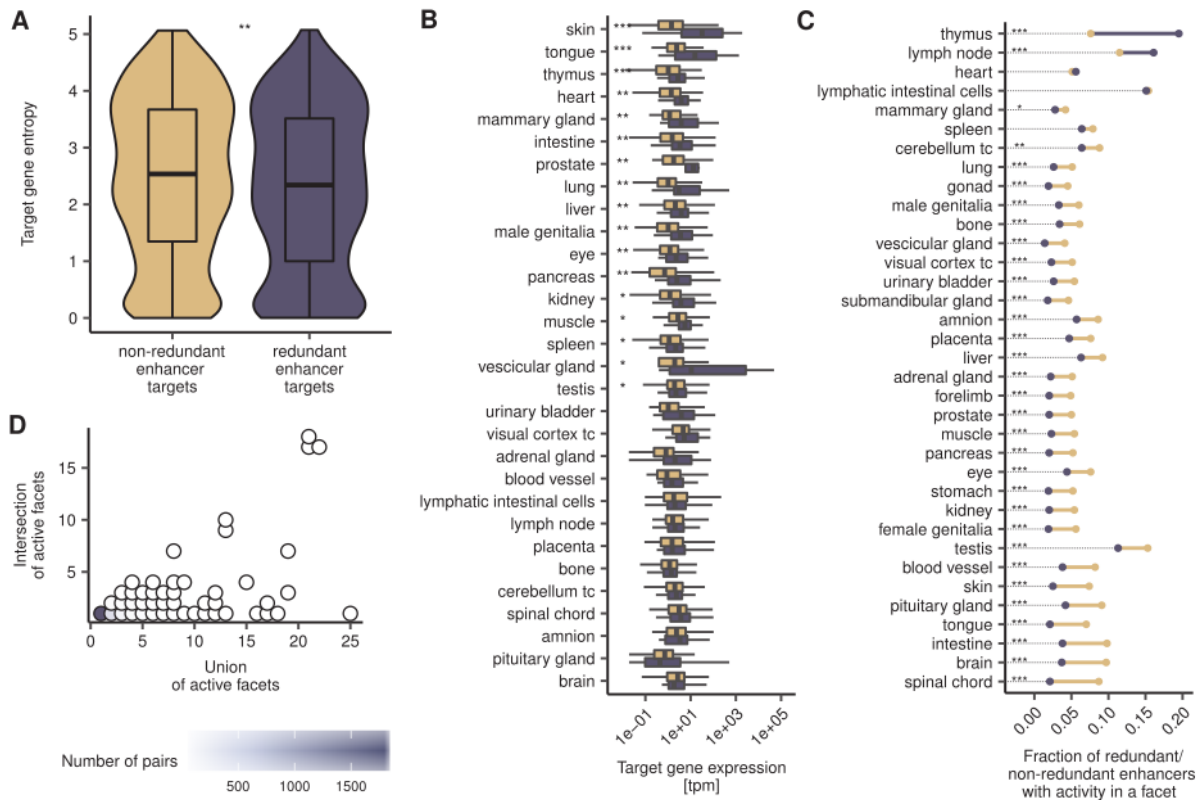

Figure S10. Comparison of shadow and non-shadow mouse enhancers. A) Target gene entropies of non-shadow (beige) and shadow (purple) enhancer target genes, Wilcoxon rank sum test.  $^{***} P < 0.01$ . B) Facet-specific expression of non-shadow (beige) and shadow (purple) enhancer target genes, adjusted  $P$ -values of Wilcoxon rank sum tests.  $^{*} P < 0.05$ ,  $^{***} P < 0.01$ ,  $^{****} P < 0.001$ . C) Dumbbell plot showing the fractions of active non-shadow (beige) and shadow (purple) enhancers per facet. If the fraction of active non-shadow enhancers is larger than that of shadow enhancers, the line between the dots is depicted in beige; otherwise, in purple. The only purpose of the dotted lines is to serve as visual aids. Asterisks indicate adjusted  $P$ -values of Fisher's exact tests: Significance code see B). D) Redundancy of shadow enhancer pairs.

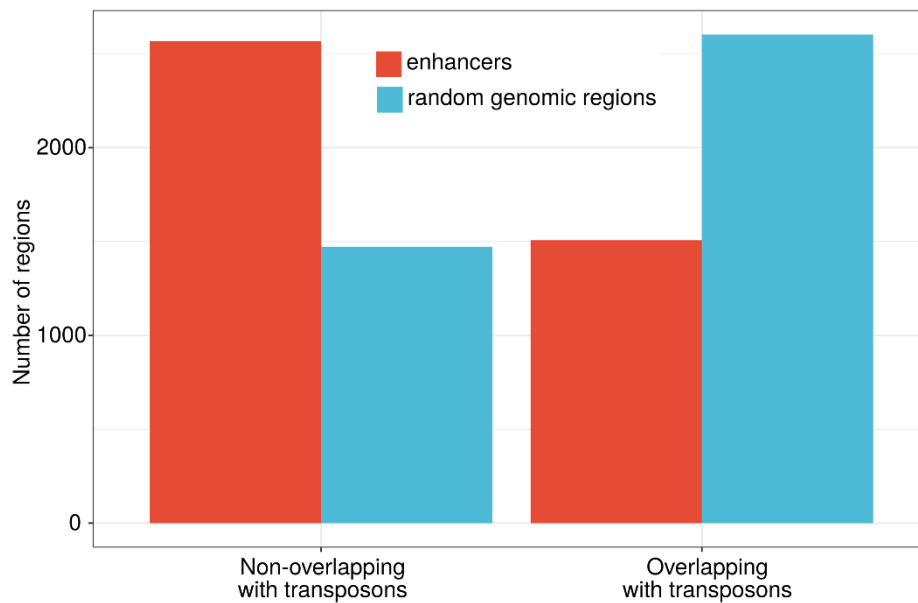

Figure S11. Number of mouse enhancers annotated as transposons. The numbers of elements that overlap with transposons and elements that do not overlap with transposons are reversed in random genomic regions as compared to enhancers.



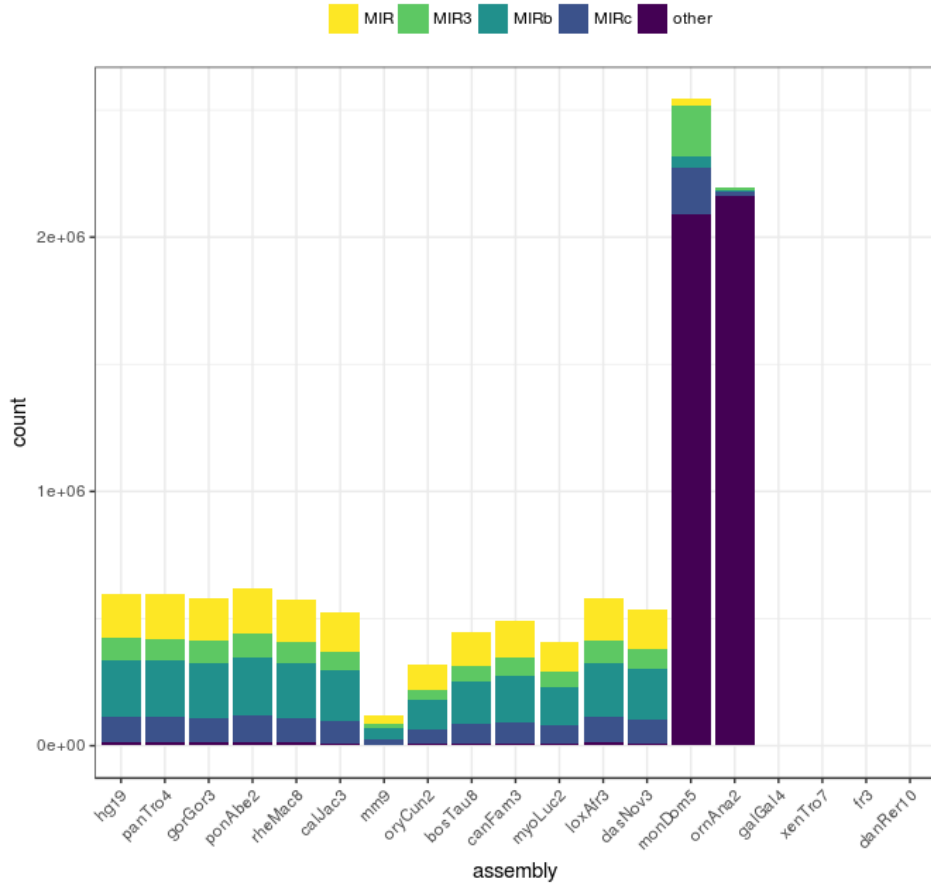

Figure S12: Number of TE instances for different MIR species in each of the assemblies considered in this study. The figure illustrates the number of TE species from the MIR family, which were active before the mammalian radiation. The number of MIRb, MIR3, MIRc and MIR instances in the mouse genome is much smaller than that in the human genome and the genomes of most other mammalian species used in this study. However, the vast majority of these transposons were inserted in the genome of the common ancestor before the mammalian radiation, and thus, are expected to be mostly shared by its descendants. "other" summarizes all other MIR families, which are mostly specific to the monotremata or marsupalia clades. In summary, many such MIRb, MIR3, MIRc and MIR instances appear to have diverged faster in the mouse genome, to the point where they are no longer recognizable. This rationale can be extended to other TE families.

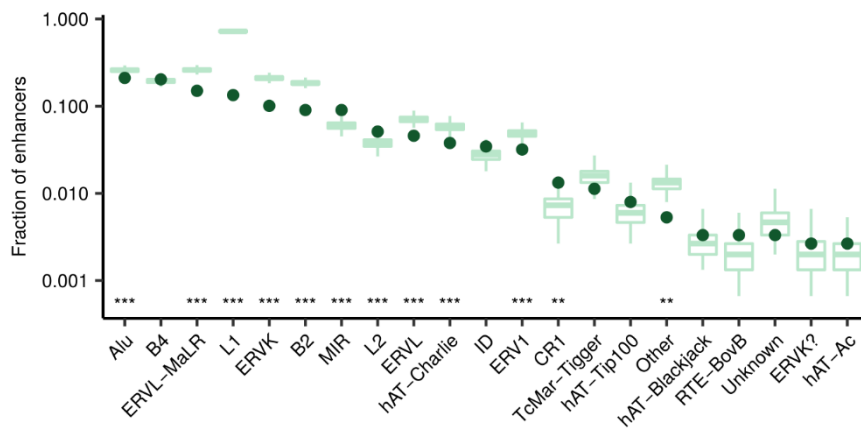

Figure S13. Enrichment of transposon families in transposon enhancers compared to random genomic sequences. Asterisks indicate adjusted empirical P-values. '\* P < 0.05, '\*\* P < 0.01, '\*\*\*' P < 0.001. For further description refer to Figure 2A.

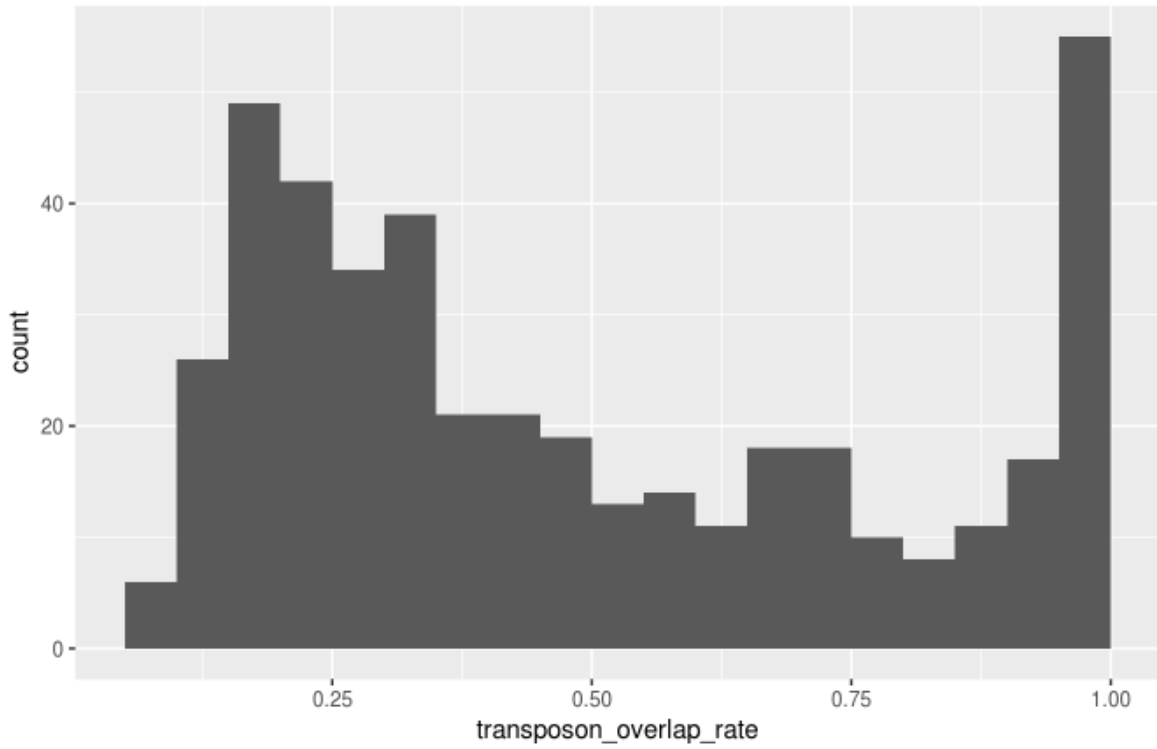

Figure S14. The fraction of transposon-redundant enhancers overlapping with transposons.

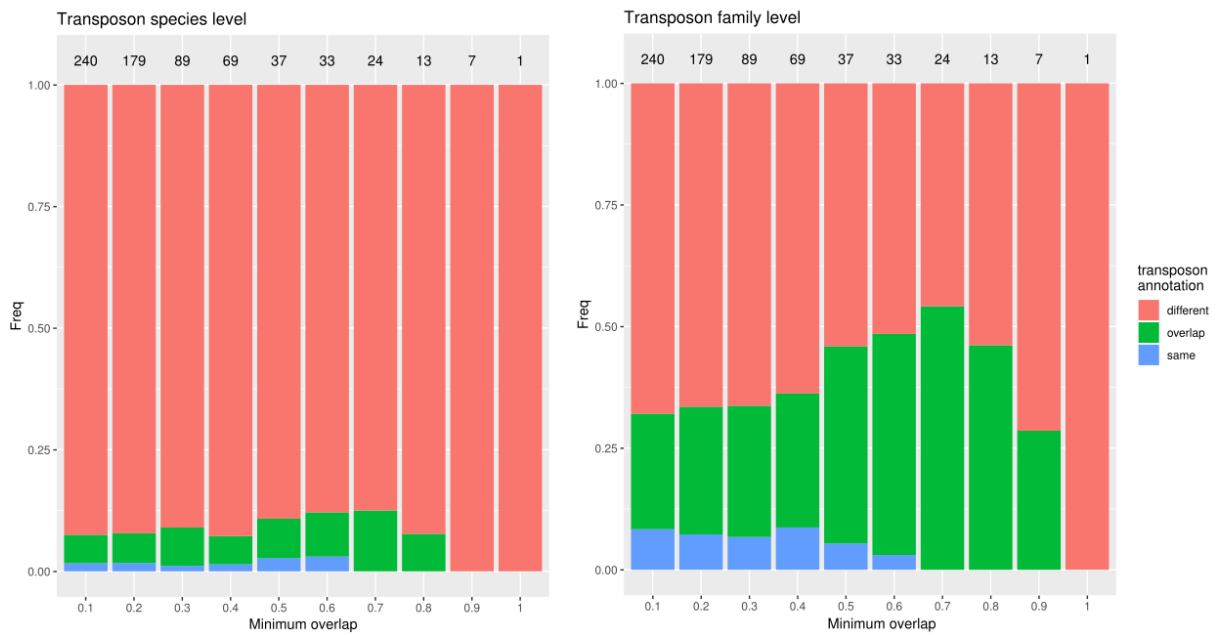

Figure S15. Comparison of transposon redundant enhancer annotation for the redundant enhancer pairs that are based on a correlation coefficient = 1 (see also the caption of Figure S6).

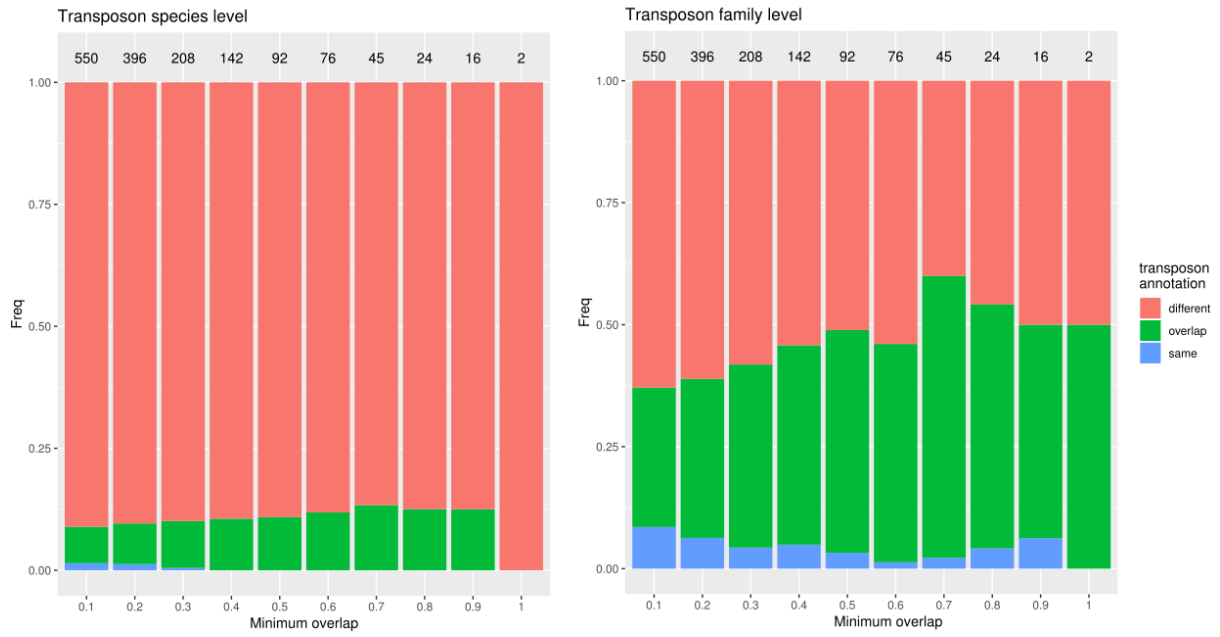

Figure S16. Comparison of transposon redundant enhancer annotation for the redundant enhancer pairs that are based on even stricter target gene assignment via an empirical *P*-value (see supplementary Materials and Methods and the caption of Figure S6).

## SUPPLEMENTARY TABLES

Table S1. Human tissue samples generated by the FANTOM5 consortium (phase 2.5) assigned to each facet. The data were kindly provided by the FANTOM5 consortium.

| Sample_ID           | Facet                                                                                                                                                                                                                                                                                                                                                                                                                                                                                                                                                                                                                                                                                                                                                                                                                                                    |
|---------------------|----------------------------------------------------------------------------------------------------------------------------------------------------------------------------------------------------------------------------------------------------------------------------------------------------------------------------------------------------------------------------------------------------------------------------------------------------------------------------------------------------------------------------------------------------------------------------------------------------------------------------------------------------------------------------------------------------------------------------------------------------------------------------------------------------------------------------------------------------------|
| cerebrospinal_fluid | CNhs13437                                                                                                                                                                                                                                                                                                                                                                                                                                                                                                                                                                                                                                                                                                                                                                                                                                                |
| spleen              | CNhs10631, CNhs10651                                                                                                                                                                                                                                                                                                                                                                                                                                                                                                                                                                                                                                                                                                                                                                                                                                     |
| bone_marrow         | CNhs12845                                                                                                                                                                                                                                                                                                                                                                                                                                                                                                                                                                                                                                                                                                                                                                                                                                                |
| prostate_gland      | CNhs10628                                                                                                                                                                                                                                                                                                                                                                                                                                                                                                                                                                                                                                                                                                                                                                                                                                                |
| cruciate_ligament   | CNhs13439                                                                                                                                                                                                                                                                                                                                                                                                                                                                                                                                                                                                                                                                                                                                                                                                                                                |
| adipose             | CNhs10615, CNhs13972, CNhs13973, CNhs13974, CNhs13975                                                                                                                                                                                                                                                                                                                                                                                                                                                                                                                                                                                                                                                                                                                                                                                                    |
| optic_nerve         | CNhs13449                                                                                                                                                                                                                                                                                                                                                                                                                                                                                                                                                                                                                                                                                                                                                                                                                                                |
| lung                | CNhs10625, CNhs11680, CNhs11786                                                                                                                                                                                                                                                                                                                                                                                                                                                                                                                                                                                                                                                                                                                                                                                                                          |
| tendon              | CNhs13435                                                                                                                                                                                                                                                                                                                                                                                                                                                                                                                                                                                                                                                                                                                                                                                                                                                |
| adrenal_gland       | CNhs11793                                                                                                                                                                                                                                                                                                                                                                                                                                                                                                                                                                                                                                                                                                                                                                                                                                                |
| throat              | CNhs12858, CNhs11770                                                                                                                                                                                                                                                                                                                                                                                                                                                                                                                                                                                                                                                                                                                                                                                                                                     |
| tongue              | CNhs13460, CNhs12853, CNhs11768                                                                                                                                                                                                                                                                                                                                                                                                                                                                                                                                                                                                                                                                                                                                                                                                                          |
| umbilical_cord      | CNhs11765                                                                                                                                                                                                                                                                                                                                                                                                                                                                                                                                                                                                                                                                                                                                                                                                                                                |
| esophagus           | CNhs10620                                                                                                                                                                                                                                                                                                                                                                                                                                                                                                                                                                                                                                                                                                                                                                                                                                                |
| urethra             | CNhs13464                                                                                                                                                                                                                                                                                                                                                                                                                                                                                                                                                                                                                                                                                                                                                                                                                                                |
| breast              | CNhs11792                                                                                                                                                                                                                                                                                                                                                                                                                                                                                                                                                                                                                                                                                                                                                                                                                                                |
| intestine           | CNhs12842, CNhs11794, CNhs10619, CNhs11780, CNhs11781, CNhs12997, CNhs11777, CNhs10630, CNhs11773                                                                                                                                                                                                                                                                                                                                                                                                                                                                                                                                                                                                                                                                                                                                                        |
| skin                | CNhs13458, CNhs11785, CNhs11774                                                                                                                                                                                                                                                                                                                                                                                                                                                                                                                                                                                                                                                                                                                                                                                                                          |
| placenta            | CNhs10627                                                                                                                                                                                                                                                                                                                                                                                                                                                                                                                                                                                                                                                                                                                                                                                                                                                |
| thymus              | CNhs10633, CNhs10650                                                                                                                                                                                                                                                                                                                                                                                                                                                                                                                                                                                                                                                                                                                                                                                                                                     |
| thyroid             | CNhs10634, CNhs11769                                                                                                                                                                                                                                                                                                                                                                                                                                                                                                                                                                                                                                                                                                                                                                                                                                     |
| blood               | CNhs11761                                                                                                                                                                                                                                                                                                                                                                                                                                                                                                                                                                                                                                                                                                                                                                                                                                                |
| liver               | CNhs10624, CNhs11798                                                                                                                                                                                                                                                                                                                                                                                                                                                                                                                                                                                                                                                                                                                                                                                                                                     |
| smooth_muscle       | CNhs11755                                                                                                                                                                                                                                                                                                                                                                                                                                                                                                                                                                                                                                                                                                                                                                                                                                                |
| lymph_node          | CNhs11788                                                                                                                                                                                                                                                                                                                                                                                                                                                                                                                                                                                                                                                                                                                                                                                                                                                |
| male_genitalia      | CNhs12846, CNhs12847, CNhs12850, CNhs12851, CNhs10632, CNhs12998                                                                                                                                                                                                                                                                                                                                                                                                                                                                                                                                                                                                                                                                                                                                                                                         |
| fingernail          | CNhs13445                                                                                                                                                                                                                                                                                                                                                                                                                                                                                                                                                                                                                                                                                                                                                                                                                                                |
| brain               | CNhs13793, CNhs12311, CNhs14078, CNhs11796, CNhs10617, CNhs11797, CNhs13802, CNhs12321, CNhs14232, CNhs14071, CNhs13799, CNhs12323, CNhs11795, CNhs14075, CNhs12840, CNhs10649, CNhs12610, CNhs10648, CNhs10647, CNhs13801, CNhs12319, CNhs14549, CNhs14082, CNhs13795, CNhs12312, CNhs14227, CNhs14081, CNhs10646, CNhs13808, CNhs12322, CNhs14550, CNhs14080, CNhs13796, CNhs12310, CNhs14221, CNhs14069, CNhs13809, CNhs12316, CNhs14229, CNhs14552, CNhs14070, CNhs13800, CNhs12315, CNhs10645, CNhs14079, CNhs10644, CNhs13798, CNhs12320, CNhs14073, CNhs11787, CNhs11784, CNhs10643, CNhs10642, CNhs14226, CNhs13797, CNhs12317, CNhs10641, CNhs11782, CNhs14074, CNhs13804, CNhs12228, CNhs14230, CNhs13805, CNhs12229, CNhs14231, CNhs10640, CNhs10638, CNhs12324, CNhs13912, CNhs14225, CNhs14618, CNhs14083, CNhs13803, CNhs12318, CNhs14224, |

|                         |                                                                                                   |
|-------------------------|---------------------------------------------------------------------------------------------------|
|                         | CNhs14076, CNhs10637, CNhs11772, CNhs12996, CNhs13794, CNhs12314, CNhs14223, CNhs14551, CNhs14084 |
| <b>female_genitalia</b> | CNhs10618, CNhs10626, CNhs11676, CNhs11763, CNhs12854                                             |
| <b>tonsil</b>           | CNhs10654                                                                                         |
| <b>trachea</b>          | CNhs10635, CNhs11766                                                                              |
| <b>gallbladder</b>      | CNhs12848                                                                                         |
| <b>stomach</b>          | CNhs11771                                                                                         |
| <b>heart</b>            | CNhs12855, CNhs12856, CNhs12857, CNhs11757, CNhs11758, CNhs10621, CNhs10653, CNhs11790, CNhs11789 |
| <b>bladder</b>          | CNhs10616                                                                                         |
| <b>salivary_gland</b>   | CNhs11677, CNhs12852                                                                              |
| <b>parotid_gland</b>    | CNhs12849                                                                                         |
| <b>eye</b>              | CNhs13444, CNhs13442, CNhs13443, CNhs13441, CNhs13440, CNhs11762, CNhs10636                       |
| <b>blood_vessel</b>     | CNhs11760, CNhs12843, CNhs12844                                                                   |
| <b>kidney</b>           | CNhs10622, CNhs10652                                                                              |
| <b>skeletal_muscle</b>  | CNhs11779, CNhs13454, CNhs10629, CNhs11776                                                        |
| <b>olfactory_region</b> | CNhs12611                                                                                         |
| <b>pancreas</b>         | CNhs11756                                                                                         |
| <b>spinal_cord</b>      | CNhs13807, CNhs12227, CNhs14222, CNhs11764, CNhs14077                                             |

Table S2. Mouse tissue samples generated by the FANTOM5 consortium (phase 2.5) assigned to each facet. The data were kindly provided by the FANTOM5 consortium.

| <b>Sample_ID</b>           | <b>Facet</b>                                                                                                                                                                                                    |
|----------------------------|-----------------------------------------------------------------------------------------------------------------------------------------------------------------------------------------------------------------|
| <b>prostate</b>            | CNhs10470                                                                                                                                                                                                       |
| <b>stomach</b>             | CNhs10503, CNhs10588, CNhs10603, CNhs11022, CNhs11006, CNhs10999, CNhs11193, CNhs11210, CNhs11104, CNhs11134                                                                                                    |
| <b>mammary_gland</b>       | CNhs10480, CNhs10476                                                                                                                                                                                            |
| <b>adrenal_gland</b>       | CNhs10508, CNhs11038, CNhs11004, CNhs11043, CNhs11026, CNhs11191, CNhs11223                                                                                                                                     |
| <b>spinal_chord</b>        | CNhs10505                                                                                                                                                                                                       |
| <b>pituitary_gland</b>     | CNhs10493, CNhs11018, CNhs11009, CNhs11037, CNhs10592, CNhs11036, CNhs11039, CNhs11190                                                                                                                          |
| <b>amnion</b>              | CNhs10488                                                                                                                                                                                                       |
| <b>submandibular_gland</b> | CNhs10469                                                                                                                                                                                                       |
| <b>female_genitalia</b>    | CNhs10507, CNhs11040, CNhs11217, CNhs10500, CNhs10509, CNhs10497, CNhs10502                                                                                                                                     |
| <b>visual_cortex_tc</b>    | CNhs13040, CNhs13041, CNhs13821, CNhs13042, CNhs13043, CNhs13044, CNhs13045, CNhs13046, CNhs13048, CNhs13031, CNhs13032, CNhs13033, CNhs13820, CNhs13034, CNhs13035, CNhs13036, CNhs13037, CNhs13038, CNhs13039 |
| <b>urinary_bladder</b>     | CNhs10481                                                                                                                                                                                                       |
| <b>pancreas</b>            | CNhs10486, CNhs11012, CNhs11042, CNhs11003, CNhs10599, CNhs10580, CNhs11105, CNhs11138, CNhs11139, CNhs11136, CNhs11094, CNhs11182                                                                              |

|                                   |                                                                                                                                                                                                                                                                                                                                                                                                            |
|-----------------------------------|------------------------------------------------------------------------------------------------------------------------------------------------------------------------------------------------------------------------------------------------------------------------------------------------------------------------------------------------------------------------------------------------------------|
| <b>liver</b>                      | CNhs10466, CNhs10601, CNhs10524, CNhs10594, CNhs10520, CNhs10523, CNhs10510, CNhs10579, CNhs11117, CNhs11123, CNhs11101, CNhs11103, CNhs11115, CNhs11220, CNhs11198, CNhs11106                                                                                                                                                                                                                             |
| <b>forelimb</b>                   | CNhs10596, CNhs10600, CNhs10589, CNhs10577, CNhs11007, CNhs10598, CNhs11008                                                                                                                                                                                                                                                                                                                                |
| <b>blood_vessel</b>               | CNhs10498                                                                                                                                                                                                                                                                                                                                                                                                  |
| <b>male_genitalia</b>             | CNhs11218, CNhs11199, CNhs10490                                                                                                                                                                                                                                                                                                                                                                            |
| <b>testis</b>                     | CNhs10504, CNhs11031, CNhs11034, CNhs11033, CNhs11029, CNhs11027, CNhs11189, CNhs11222, CNhs11204, CNhs11110, CNhs11130                                                                                                                                                                                                                                                                                    |
| <b>intestine</b>                  | CNhs10467, CNhs10468, CNhs13199, CNhs10506, CNhs10496, CNhs11019, CNhs11010, CNhs10602, CNhs10585, CNhs10582, CNhs10526, CNhs11126, CNhs11192, CNhs11102, CNhs11095, CNhs11098, CNhs11187, CNhs11121, CNhs11131, CNhs11114                                                                                                                                                                                 |
| <b>gonad</b>                      | CNhs11044                                                                                                                                                                                                                                                                                                                                                                                                  |
| <b>bone</b>                       | CNhs10483, CNhs11227, CNhs11225, CNhs11195                                                                                                                                                                                                                                                                                                                                                                 |
| <b>vescicular_gland</b>           | CNhs10491                                                                                                                                                                                                                                                                                                                                                                                                  |
| <b>thymus</b>                     | CNhs10471, CNhs11041, CNhs11005, CNhs11002, CNhs10581, CNhs10595, CNhs11181, CNhs11137, CNhs11197, CNhs11211, CNhs11194, CNhs11186, CNhs11125, CNhs11132                                                                                                                                                                                                                                                   |
| <b>lymphatic_intestinal_cells</b> | CNhs13211, CNhs13200                                                                                                                                                                                                                                                                                                                                                                                       |
| <b>lymph_node</b>                 | CNhs10475                                                                                                                                                                                                                                                                                                                                                                                                  |
| <b>kidney</b>                     | CNhs10606, CNhs10997, CNhs10584, CNhs11028, CNhs11001, CNhs11214, CNhs11206, CNhs11113, CNhs11122, CNhs11203                                                                                                                                                                                                                                                                                               |
| <b>heart</b>                      | CNhs10586, CNhs11015, CNhs11013, CNhs10597, CNhs11017, CNhs11021, CNhs11025, CNhs11030, CNhs11213, CNhs11221, CNhs11118, CNhs11209, CNhs11127, CNhs11196, CNhs11202                                                                                                                                                                                                                                        |
| <b>placenta</b>                   | CNhs10472, CNhs10464                                                                                                                                                                                                                                                                                                                                                                                       |
| <b>brain</b>                      | CNhs10494, CNhs11135, CNhs10501, CNhs10487, CNhs11226, CNhs10473, CNhs11107, CNhs10482, CNhs11201, CNhs10478, CNhs11228, CNhs10477, CNhs11200, CNhs10489                                                                                                                                                                                                                                                   |
| <b>tongue</b>                     | CNhs10499                                                                                                                                                                                                                                                                                                                                                                                                  |
| <b>spleen</b>                     | CNhs10465, CNhs11035, CNhs11011, CNhs11116, CNhs11112, CNhs11099                                                                                                                                                                                                                                                                                                                                           |
| <b>skin</b>                       | CNhs10492, CNhs11124, CNhs11215, CNhs11097, CNhs11108                                                                                                                                                                                                                                                                                                                                                      |
| <b>muscle</b>                     | CNhs11129                                                                                                                                                                                                                                                                                                                                                                                                  |
| <b>lung</b>                       | CNhs10474, CNhs10522, CNhs10604, CNhs11020, CNhs10998, CNhs10605, CNhs10583, CNhs11224, CNhs11212, CNhs11111, CNhs11219, CNhs11109, CNhs11119, CNhs11133                                                                                                                                                                                                                                                   |
| <b>cerebellum_tc</b>              | CNhs12956, CNhs13002, CNhs13014, CNhs12957, CNhs13003, CNhs13015, CNhs12958, CNhs13004, CNhs13016, CNhs12960, CNhs13005, CNhs13017, CNhs12961, CNhs13006, CNhs13018, CNhs13000, CNhs13007, CNhs13019, CNhs12818, CNhs13008, CNhs13020, CNhs12962, CNhs13009, CNhs13021, CNhs12963, CNhs13010, CNhs13022, CNhs13001, CNhs13011, CNhs13024, CNhs12819, CNhs13012, CNhs13025, CNhs12820, CNhs13013, CNhs13026 |
| <b>eye</b>                        | CNhs10484, CNhs11016, CNhs10521, CNhs10593, CNhs11023, CNhs11207, CNhs11140, CNhs11205, CNhs11188                                                                                                                                                                                                                                                                                                          |

Table S3. Assignments of human facets to the tissues of ENCODE TF ChIP-seq assays.

| Facet           | ENCODE tissue                      |
|-----------------|------------------------------------|
| blood           | B cell                             |
| blood           | erythroblast                       |
| blood vessel    | endothelial cell of umbilical vein |
| bone marrow     | osteoblast                         |
| brain           | astrocyte                          |
| brain           | neural cell                        |
| liver           | liver                              |
| lung            | fibroblast of lung                 |
| skeletal muscle | skeletal muscle myoblast           |
| skeletal muscle | myotube                            |
| skin            | fibroblast of dermis               |
| smooth muscle   | skeletal muscle myoblast           |
| smooth muscle   | myotube                            |

Table S4. Construction of the human and mouse enhancer datasets. Number of regions for sets defined based on multiple criteria. Each set of regions is a subset of the set in the previous row.

|                                                              | Human  | Mouse  |
|--------------------------------------------------------------|--------|--------|
| <b>FANTOM enhancers</b>                                      | 65,423 | 44,459 |
| - <b>excluding FANTOM promoters and Ensembl coding exons</b> | 54,284 | 38,662 |
| - <b>active in our facets</b>                                | 11,582 | 9,426  |
| - <b>in TADs</b>                                             | 10,609 | 8,805  |
| - <b>in TADs that comprise at least one active promoter</b>  | 10,445 | 8,762  |
| - <b>significantly correlated with one or more promoters</b> | 3,523  | 4,074  |

Table S5. Construction of the human and mouse promoter datasets. Number of regions for sets defined based on multiple criteria. Each set of regions is a subset of the set in the previous row.

|                                                              | Human   | Mouse   |
|--------------------------------------------------------------|---------|---------|
| <b>FANTOM promoters</b>                                      | 201,799 | 158,965 |
| - <b>active in our facets</b>                                | 165,749 | 131,995 |
| - <b>near an Ensembl TSS of a coding gene</b>                | 72,272  | 59,430  |
| - <b>in TADs</b>                                             | 60,329  | 52,298  |
| - <b>in TADs that comprise at least one active enhancer</b>  | 55,612  | 48,323  |
| - <b>significantly correlated with one or more enhancers</b> | 6,474   | 8,082   |

Table S6. Number of enhancers, enhancer pairs and enhancer groups for multiple sets in mouse. For a description of the sets see Table 1 in the main manuscript.

| Set                                     | Nr of enhancers | Nr of pairs | Nr of groups | Coloring in main figures |
|-----------------------------------------|-----------------|-------------|--------------|--------------------------|
| <b>Correlated enhancers</b>             | 4,074           | -           | -            | Gray                     |
| <b>Shadow enhancers</b>                 | 1,939           | 2,787       | 670          | Purple                   |
| <b>Transposon overlapping enhancers</b> | 1,507           | -           | -            | Green                    |
| <b>Transposon-shadow enhancers</b>      | 503             | 493         | 192          | Red/magenta              |

## SUPPLEMENTARY MATERIALS AND METHODS

### Target gene assignment with empirical P-values

In order to show the significance of our enhancer promoter correlation coefficients, we tested whether the correlation coefficient was significantly higher than correlations of the enhancer to a set of background genes. Specifically, for each enhancer, we calculated the correlations with each promoter in the 20 neighboring TADs. Since these correlations are unlikely to represent true interactions, we used them as a background distribution. The empirical P-value was defined as the number of background correlations with an equal or more extreme coefficient than the observed correlation divided by the total number of background correlations. The empirical P-values were FDR-corrected for multiple testing. The same thresholds as before were applied to the correlation coefficients and the (FDR-corrected) P-values. The so formed enhancer promoter associations were used to form pairs of redundant enhancers as before and these transposon annotation of these pairs were tested as before (see Figure S16).
